# Supplementary material for: Predicting Difficult Videolaryngoscopic Intubation in Patients with Obesity Using Ultrasound: An Observational, Prospective Study
Source: Research Square preprint supplement (doi:10.21203/rs.3.rs-7131036/v1), 2025-08-27
Supplement: Supplementary file 1 [file 5c601cb176a2dc80d1f2ee50.docx]

**
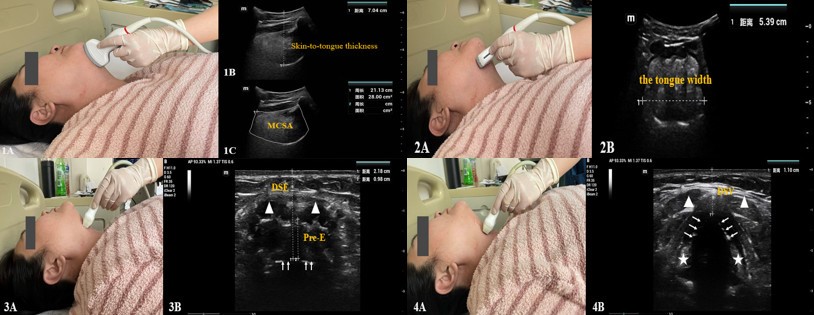
eFigure 1**. (A)The convex array probe was placed under the chin in the midsagittal plane. (B) White dashed line: skin-to-tongue thickness. Skin-to-tongue thickness of one patient was 7.04 cm. (C)White curved area: midsagittal cross-sectional area (MCSA) of the tongue. The MCSA of the tongue of one patient was 28.00 cm².

**eFigure 2**. (A)The convex array probe was placed transversely under the chin to obtain an entire tongue outline. (B)White dashed line: tongue width. The tongue width of one patient was 5.39 cm.

**eFigure 3**. (A)The linear probe was placed transversely at the level of thyrohyoid membrane. (B)White dashed line on the left: distance from the skin to the epiglottis (DSE). White dashed line on the right: depth of the pre-epiglottic space (Pre-E). The DSE of one patient was 2.18 cm, and the Pre-E of one patient was 0.98 cm.

Solid arrow: air-mucosal interface, triangles: strap muscles (thyrohyoid muscles).

**eFigure 4**. (A)The linear probe was placed transversely at the level of thyroid cartilage. (B)White dashed line: distance from the skin to the vocal cords (DSV). The DSV of one patient was 1.10 cm.

Solid arrow: vocal cords; stars: arytenoid cartilage; triangles: strap muscles.
