# Supplementary material for: Predicting Difficult Videolaryngoscopic Intubation in Patients with Obesity Using Ultrasound: An Observational, Prospective Study
Source: Research Square preprint supplement (doi:10.21203/rs.3.rs-7131036/v1), 2025-08-27
Supplement: Supplementary file 2 [file 66584726763e086bc384607c.docx]

**eTable Ⅱ**. The detailed scoring scale of the VIDIAC score

| The Detailed Scoring Scale | | Score |
| --- | --- | --- |
| ***E**piglottis: interaction with blade（0~3） |  |  |
| Impaired movement | 1 |
| Increased lifting force | 1 |
| Direct lifting | 1 |
| ***V**ocal cords: best view（-1~1） |  |  |
| Clearly visible | -1 |
| Only just visible | 0 |
| Not visible | 1 |
| **A**rytenoids: posterior laryngeal inlet（0~1） | Enlarged arytenoids | 1 |
| Ovreall score = **E**+**V**+**A** | | -1~5 |

*Three epiglottis variables (“impaired movement”, “increased lifting force” and “direct lifting”) are the relation of **“and”**. Two glottic view variables (vocal cords “clearly visible”, “only just visible” and “not visible”) are the relation of **“or”**.
