# Supplementary material for: Predicting Difficult Videolaryngoscopic Intubation in Patients with Obesity Using Ultrasound: An Observational, Prospective Study
Source: Research Square preprint supplement (doi:10.21203/rs.3.rs-7131036/v1), 2025-08-27
Supplement: Supplementary file 3 [file 7ed3f12b072166deecca1d91.docx]

**eTable Ⅰ**. The detailed scoring scale of the LEMON method

| The Detailed Scoring Scale | | Score |
| --- | --- | --- |
| **L**ook |  |  |
|  | Protruding teeth | 1 |
| Facial trauma | 1 |
| Large tongue | 1 |
| Beard or moustache | 1 |
| **E**valuate |  |  |
|  | Interincisor distance < 3 fingers | 1 |
|  | Hyomental distance < 3 fingers | 1 |
|  | Hyothyroid distance < 2 fingers | 1 |
| **M**allampati |  |  |
|  | Modified Mallampati score ≥ class Ⅲ | 1 |
| **O**bstruction: Obstructed airway | | 1 |
| **N**eck mobility: Restricted neck mobility | | 1 |
| Ovreall score | | 10 |
