# Supplementary figures and images for: Predicting Difficult Videolaryngoscopic Intubation in Patients with Obesity Using Ultrasound: An Observational, Prospective Study
Source: Research Square preprint supplement (doi:10.21203/rs.3.rs-7131036/v1), 2025-08-27

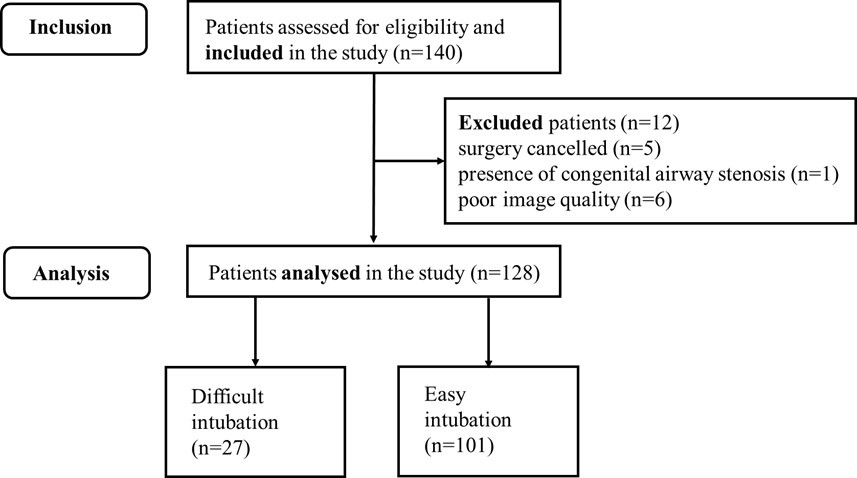
**eFigure 5**. A flow chart of patients included in the study

Supplement: Supplementary file 4 [file e930df1ab26fe2d159a70412.docx]
